# Supplementary material for: Kognition und Kraftfahreignung bei chronischem Schmerzsyndrom
Source: Springer Nature journal article supplement (doi:10.1007/s00115-022-01387-y), 2022-09-28
Supplement: MOESM1 [file 23548432]

**eTab. 1 Studienlage Chronisches Schmerzsyndrom und Fahrverhalten**

CS = Chronischer Schmerz, KG = Kontrollgruppe

| Autoren Land                          | Stichprobe Alter                                                                                                                                                | Methode                                                                | Neurokognitive Domänen/ Verfahren Ergebnisse                                                                                                                                                                                                              | Psychosoziale Verfahren Ergebnisse                                                                                                                                                                             | Fahrverhalten Ergebnisse                                  | Einteilung nach Michon<br>Operational (I)<br>Taktisch (II)<br>Strategisch (III) |
|---------------------------------------|-----------------------------------------------------------------------------------------------------------------------------------------------------------------|------------------------------------------------------------------------|-----------------------------------------------------------------------------------------------------------------------------------------------------------------------------------------------------------------------------------------------------------|----------------------------------------------------------------------------------------------------------------------------------------------------------------------------------------------------------------|-----------------------------------------------------------|---------------------------------------------------------------------------------|
| Bell et al., 2020 [11]<br>USA         | CS (Rücken)<br>n = 308,<br>KG n = 813,<br>Alter: +55                                                                                                            | Selbstauskunft,<br>Kognitive Tests<br>Längsschnittstudie über 15 Jahre | Geteilte Aufmerksamkeit: Useful Field of View (UFOV) Subtest 2, Verarbeitungsgeschwindigkeit: TMT A, Kognitive Umstellungsfähigkeit: TMT B, Visuospatale Wahrnehmung: Motor Visual Perception Task (MVPT)<br>Zusammenhänge zwischen MVPT und Autounfällen |                                                                                                                                                                                                                | Höhere Wahrscheinlichkeit für Autounfälle bei CS (Rücken) | II (z.B. Einschätzen von Abständen zwischen Fahrzeugen)                         |
| Benyamina et al., 2018 [12]<br>Kanada | CS (Rücken)<br>n = 621,<br>Akut (Rücken)<br>n = 899,<br>KG n = 688,<br>Alter: 0 - +55<br>Polizeibeamte                                                          | Selbstauskunft                                                         |                                                                                                                                                                                                                                                           | Perceived Stress Scale (PSS), Patient Health Questionnaire (PHQ-2), Generalized Anxiety Disorder scale (GAD-2), Chronic Pain Sleep Inventory (CPSI)<br>Unterschiede in der Schlafqualität zwischen den Gruppen | Geringerer Komfort beim Autofahren bei CS                 |                                                                                 |
| Byas-Smith et al., 2005 [21]<br>USA   | CS (Rücken, Nacken, Kopf)<br>n = 11,<br>Alter: 46.5 (6.9)<br>CS (Rücken, Nacken, Kopf, Opiode) n = 21,<br>Alter: 47.7 (10.9)<br>KG n = 50,<br>Alter: 42.6 (9.1) | Selbstauskunft,<br>Kognitive Tests,<br>Autofahrt                       | Aufmerksamkeit: Test of Variables of Attention (TOVA)<br>Verarbeitungsgeschwindigkeit: Zeichen Symbol Test (ZST).<br>KG höhere ZST Werte (Keine Zusammenhänge mehr nach Kontrolle von Alter und Bildung)                                                  | Visuelle Analog Skala (VAS)                                                                                                                                                                                    | Keine Gruppenunterschiede                                 |                                                                                 |

| Autoren Land                           | Stichprobe Alter                                                                                                                                         | Methode        | Neurokognitive Domänen/ Verfahren Ergebnisse                                                                                                                           | Psychosoziale Verfahren Ergebnisse                                                                                                                                                                                                                                                    | Fahrverhalten Ergebnisse                                                                                                                                                                                                                                    | Einteilung nach Michon |
|----------------------------------------|----------------------------------------------------------------------------------------------------------------------------------------------------------|----------------|------------------------------------------------------------------------------------------------------------------------------------------------------------------------|---------------------------------------------------------------------------------------------------------------------------------------------------------------------------------------------------------------------------------------------------------------------------------------|-------------------------------------------------------------------------------------------------------------------------------------------------------------------------------------------------------------------------------------------------------------|------------------------|
| Fan et al., 2012 [34]<br>Kanada        | CS (Nacken, Rücken) n = 223, Alter: 49.9 (10.4)<br>CS Fahrer n = 176, Alter: 49.3 (10.1)<br>CS keine Fahrer n = 41, Alter: 52.5 (11.9)<br>CS (k.A) n = 6 | Selbstauskunft |                                                                                                                                                                        | Numerische Rating Skala (NRS), Pain Disability Index (PDI), Patient Health Questionnaire<br>Gruppenunterschiede im PDI                                                                                                                                                                | CS 70%<br>Einschränkungen beim Fahren davon Schmerz (88,6%), Fatigue (50,6%), eingeschränkte Mobilität (48,3%), Schwächegefühl (19,4%), keine Schwierigkeiten (6%).<br>6% berichteten Unfälle im letzten Jahr. 56% stellten Autofahren wegen Schmerzen ein. |                        |
| Foley et al., 1995 [38]<br>USA         | n = 1791, Alter: +68.<br>Iowa Department of Motor Vehicles                                                                                               | Selbstauskunft | Short portable mental status questionnaire (SPMSQ), Gedächtnis: 20 Wörter<br>Gedächtnistest<br>Zusammenhänge zwischen schlechten Gedächtnisleistungen und Autounfällen | Center for Epidemiologic Studies Depression (CES-D)<br>Zusammenhänge zwischen depressiven Symptomen und Autounfällen                                                                                                                                                                  | Erhöhtes Unfallrisiko bei Menschen mit Rückenschmerzen                                                                                                                                                                                                      |                        |
| Hoving et al., 2003 [52]<br>Australien | CS (Nacken, Kopf, Schulter, Arm, Rücken) n = 71, Alter: 40.1 (14.3)                                                                                      | Selbstauskunft |                                                                                                                                                                        | Neck Pain Questionnaire (NPQ), Neck Disability Index (NDI), Problem elicitation technique (PET)<br>PET = 7,7 Probleme: Arbeit für wenig Lohn (52.1%), Fatigue (50.7%), Sport (47.9%), Depression (43.7%), Freundschaften (33.8%), Schlaf (31.0%), Frustration (31.0%), Ärger (28.2%). | Berichtete Schwierigkeiten beim Autofahren (43,7%)                                                                                                                                                                                                          |                        |

| Autoren Land                           | Stichprobe Alter                                                                   | Methode                          | Neurokognitive Domänen/ Verfahren Ergebnisse | Psychosoziale Verfahren Ergebnisse | Fahrverhalten Ergebnisse                                                                                                                                                                  | Einteilung nach Michon |
|----------------------------------------|------------------------------------------------------------------------------------|----------------------------------|----------------------------------------------|------------------------------------|-------------------------------------------------------------------------------------------------------------------------------------------------------------------------------------------|------------------------|
| Jones et al., 1991 [57]<br>Neuseeland  | CS (Rheumatoide Arthritis, Osteoarthritis, Fibromyalgie)<br>n = 94,<br>Alter: k.A. | Selbstauskunft, Autofahrt        |                                              |                                    | 82% als sichere Fahrer eingeschätzt. Empfehlung Modifikation Fahrzeug an Einschränkungen.                                                                                                 |                        |
| Jones et al., 2010 [56]<br>UK          | CS (Fuß, Knöchel)<br>n = 20,<br>Alter: 62.7                                        | Selbstauskunft, Telefoninterview |                                              |                                    | Eingeschränktes Fahren durch Knöchel- oder Fußschmerzen. 5% nicht mehr fähig zum Autofahren. Empfehlung Umbau des Fahrzeuges. Mögliche Umbaumaßnahme weitgehend unbekannt bei Behandlern. |                        |
| Lagarde et al. 2005 [63]<br>Frankreich | n = 13843,<br>Alter: +35                                                           | Selbstauskunft                   |                                              |                                    | Erhöhtes Risiko für Autounfälle durch Schmerz und Schmerzbehandlung. Zusammenhang Verkehrsunfälle und Zahn- und Zahnfleischprobleme bei Männern, Nierenkolik und Nierensteine bei Frauen. |                        |
| McGwin et al. 2000 [69]<br>USA         | n = 901,<br>Alter: +65                                                             | Selbstauskunft, Telefoninterview | SPMSQ                                        |                                    | Erhöhtes Risiko für Autounfälle bei Frauen mit Arthritis.                                                                                                                                 |                        |

| Autoren Land                            | Stichprobe Alter                                                                                                                                            | Methode                                       | Neurokognitive Domänen/ Verfahren Ergebnisse | Psychosoziale Verfahren Ergebnisse                                                                                                                                           | Fahrverhalten Ergebnisse                                                                                                                                                                       | Einteilung nach Michon |
|-----------------------------------------|-------------------------------------------------------------------------------------------------------------------------------------------------------------|-----------------------------------------------|----------------------------------------------|------------------------------------------------------------------------------------------------------------------------------------------------------------------------------|------------------------------------------------------------------------------------------------------------------------------------------------------------------------------------------------|------------------------|
| Nilsen et al. 2011 [80]<br>Norwegen     | CS n = 20,<br>Alter: 42.4 (8.0)<br>CS (keine Opioide)<br>n = 20,<br>Alter: 43.2 (6.2)<br>KG n = 20,<br>Alter: 37.7 (10.0)                                   | Fahr-<br>simulator                            |                                              | EORTC QLQ-C30,<br>Big Five Inventory (BFI).<br>Gruppenunterschiede in<br>allen Skalen des EORTC<br>QLQ-C30 sowie Extraversion<br>und Neurotizismus                           | Gruppen-<br>unterschiede<br>Reaktionszeit und<br>Beachtung von<br>Verkehrsschildern:<br>CS > KG.<br>Keine Unterschiede<br>zwischen CS mit und<br>ohne Opioide in<br>Bezug auf<br>Fahrverhalten |                        |
| Okunribido et al., 2006 [83]<br>UK      | CS (Rücken)<br>n = 61,<br>Alter: 19-64<br>Busfahrer                                                                                                         | Selbstauskunft,<br>Busfahrt                   |                                              | Kein Einfluss des Schmerzes<br>auf die Teilnahme an<br>sozialen Aktivitäten                                                                                                  | Wenig Einfluss des<br>Rückenschmerzes<br>auf die Arbeit.<br>20% vermeiden<br>Autofahren<br>aufgrund von<br>Schmerz.                                                                            |                        |
| Pereira et al., 2008 [88]<br>Australien | CS (Schleudertraumata)<br>n = 30,<br>Alter:<br>33,8 (9,4)<br>KG n = 30,<br>Alter: 25.6 (5.1)                                                                | Selbstauskunft,<br>Messung<br>Rotation<br>HWS |                                              | NDI, General Health<br>Questionnaire (GHQ-28),<br>Impact of Events Scale<br>Revised (IES- R), Tampa<br>Scale for Kinesiophobia,<br>Gruppenunterschiede<br>GHQ-28, NDI, IES-R | Mehr berichtete<br>Schwierigkeiten beim<br>Fahren bei CS.<br>27% benötigten<br>Unterstützung durch<br>Mitfahrer, 23% Angabe,<br>dass sie Fahren<br>reduzieren sollten.                         |                        |
| Röijezon et al., 2010 [98]<br>Schweden  | CS (Nacken)<br>n1 = 16,<br>Alter: 45 (10)<br>KG n1 = 16,<br>Alter: 48 (7),<br>CS n2 = 102,<br>Alter: 47 (10),<br>KG n2 = 33,<br>Alter: 51 (9)<br>Nur Frauen | Selbstauskunft,<br>Messung<br>Rotation<br>HWS |                                              | NRS, Short Form Health<br>Survey (SF-36), NDI,<br>Disability Arm Shoulder<br>Hand Questionnaire<br>(DASH), Tampa Scale of<br>Kinesiophobia (TSK)                             | CS selbstberichtete<br>Einschränkungen beim<br>Autofahren                                                                                                                                      |                        |

| Autoren Land                               | Stichprobe Alter                                                                                                       | Methode                         | Neurokognitive Domänen/ Verfahren Ergebnisse                                                                                                                     | Psychosoziale Verfahren Ergebnisse                                                                                                                                                                                                                                                                                                                 | Fahrverhalten Ergebnisse                                                                                                                                                                              | Einteilung nach Michon |
|--------------------------------------------|------------------------------------------------------------------------------------------------------------------------|---------------------------------|------------------------------------------------------------------------------------------------------------------------------------------------------------------|----------------------------------------------------------------------------------------------------------------------------------------------------------------------------------------------------------------------------------------------------------------------------------------------------------------------------------------------------|-------------------------------------------------------------------------------------------------------------------------------------------------------------------------------------------------------|------------------------|
| Redelmeier et al., 2015 [95]<br>Kanada     | CS (Fibromyalgie)<br>n = 137631,<br>Alter: 0 - +60                                                                     | Retro-spektive Daten-analyse    |                                                                                                                                                                  |                                                                                                                                                                                                                                                                                                                                                    | Fibromyalgie ist mit einer erhöhten Wahrscheinlichkeit eines Unfallgeschehens verbunden                                                                                                               |                        |
| Shmygalev et al. 2014 [102]<br>Deutschland | CS (Fibromyalgie)<br>n = 43,<br>Alter: 38-75<br>KG n = 129,<br>Alter: 38- 75<br>Nur Frauen                             | Selbstauskunft, Kognitive Tests | Aufmerksamkeit: Cognitrone (COG), Belastbarkeit: Determinationstest (DT), Motorische Koordination: 2-Hand, Vigilanz (VIG).<br>Längere Reaktionszeit im DT bei CS | VAS, Beck Depression Inventory (BDI), SF-36, McGill Pain Questionnaire (SF-MPQ), Brief Pain Inventory (BPI), Brief Fatigue Inventory (BFI), State-Trait Anxiety Inventory (STAI)<br>Schmerz, jüngeres Alter, Depression, Angst, Fatigue, eingeschränkte motorische Koordination in Zusammenhang mit subjektiver Wahrnehmung kognitiver Dysfunktion | Keine Unterschiede in der Kraftfahreignung                                                                                                                                                            |                        |
| Takasaki et al., 2011 [106]<br>Australien  | CS (Schleudertrauma)<br>n = 33.<br>n <sub>1</sub> = 24,<br>Alter: 36.0 (9.9),<br>n <sub>2</sub> = 9, Alter: 33.9 (9.4) | Selbstauskunft, Interview       |                                                                                                                                                                  | NDI, Visual analog scale, Driving Habit Questionnaire<br>54% Angst/ Nervosität beim Autofahren<br>50% vorsichtigeres Fahren                                                                                                                                                                                                                        | 73% berichteten Einschränkungen beim Autofahren: Blinde Flecken (taktisch), längeres Fahren (strategisch), rückwärts einparken (operational), Rumpfrotation.<br>17% Vermeidung bestimmter Situationen | I, II, III             |
| Takasaki et al., 2012 [105]<br>Australien  | CS (Schleudertrauma)<br>n = 87,<br>Alter: 38.4 (11.5)                                                                  | Selbstauskunft                  |                                                                                                                                                                  | NDI, NRS<br>20% selbstberichtete Kopf-/ Nackenschmerzen, Schmerzen bei der schnellen Nackenrotation, Stress, Angst                                                                                                                                                                                                                                 | Einschränkungen bei Fahrten länger als 1 Stunde (strategisch), blinde Flecken (taktisch) und Wendemanöver (operational)                                                                               | I, II, III             |

| Autoren Land                               | Stichprobe Alter                                                                             | Methode                                                     | Neurokognitive Domänen/ Verfahren Ergebnisse                                                                                                                                                                                    | Psychosoziale Verfahren Ergebnisse                                                                                                                                                                                                                                                                 | Fahrverhalten Ergebnisse                                                                                                                                                             | Einteilung nach Michon                                          |
|--------------------------------------------|----------------------------------------------------------------------------------------------|-------------------------------------------------------------|---------------------------------------------------------------------------------------------------------------------------------------------------------------------------------------------------------------------------------|----------------------------------------------------------------------------------------------------------------------------------------------------------------------------------------------------------------------------------------------------------------------------------------------------|--------------------------------------------------------------------------------------------------------------------------------------------------------------------------------------|-----------------------------------------------------------------|
| Takasaki et al., 2013a [107]<br>Australien | CS (Schleudertrauma)<br>n = 40,<br>Alter: 34.7 (11.4)                                        | Selbstauskunft,<br>Messung Nackenrotation                   | Fatigue Severity Scale, Modified-Perceived Deficit Questionnaire, Verarbeitungsgeschwindigkeit: TMT A, Kognitive Umstellungsfähigkeit: TMT B<br>Zusammenhänge zwischen kognitiver Domäne und strategischer/ operationaler Ebene | NDI, General Health Questionnaire (GHQ-28), IES-R, Fear of Activity Scale-Cervical (19-item PEActS-C), Fear section of the Travel Phobia Questionnaire (F-TPQ)<br>Zusammenhänge zwischen physischer Domäne und taktischem Level                                                                    | Zusammenhang zwischen Symptombdauer und Einschränkungen auf strategischer und taktischer Ebene.                                                                                      | I (z.B. abruptes Bremsen),<br>II (z.B. längere Fahrten),<br>III |
| Takasaki et al., 2013b [108]<br>Australien | CS (Schleudertrauma)<br>a) n = 17,<br>Alter: 35.1 (12.0)<br>KG n = 26,<br>Alter: 36.7 (10.4) | Selbstauskunft,<br>Fahr-simulator                           | Reaktion auf roten Punkt in Rückspiegel durch Blinken<br>Keine Gruppenunterschiede bei Reaktionszeiten                                                                                                                          | NDI, Modified Motion Sickness Assessment Questionnaire (M-MSAQ)                                                                                                                                                                                                                                    | Keine Gruppenunterschiede im Fahrsimulator                                                                                                                                           |                                                                 |
| Takasaki et al., 2014 [109]<br>Australien  | CS (Schleudertrauma)<br>n = 14, Alter: 33.4 (10.8).<br>KG n = 14,<br>Alter: 35.4 (10.7)      | Selbstauskunft,<br>Messung Nackenrotation<br>Fahr-simulator | Rating Scale Mental Effort (RSME).<br>Größerer mentaler Aufwand bei CS                                                                                                                                                          | NDI, Neck Pain Driving Index (NPDI), NRS, VAS-fatigue, Modified Motion Sickness Assessment Questionnaire (M-MSAQ), Dizziness Handicap Inventory short form, Modified Perceived Deficit Questionnaire, 28-item General Health Questionnaire, IES-R, Fear section of the Travel Phobia Questionnaire | Keine Gruppenunterschiede im Fahrsimulator.<br>Korrelation von selbstberichteten Einschränkungen beim Fahren mit Intensität Schmerz, Maximalgeschwindigkeit, Nackenrotation, Fatigue |                                                                 |

| Autoren Land                                 | Stichprobe Alter                                                                     | Methode                                                                                  | Neurokognitive Domänen/ Verfahren Ergebnisse                                                                                                                                              | Psychosoziale Verfahren Ergebnisse                                                                                                                                                                                                              | Fahrverhalten Ergebnisse                                                                                                                                   | Einteilung nach Michon |
|----------------------------------------------|--------------------------------------------------------------------------------------|------------------------------------------------------------------------------------------|-------------------------------------------------------------------------------------------------------------------------------------------------------------------------------------------|-------------------------------------------------------------------------------------------------------------------------------------------------------------------------------------------------------------------------------------------------|------------------------------------------------------------------------------------------------------------------------------------------------------------|------------------------|
| Talusan et al., 2015 [110]<br>USA            | CS (Fuß, Knöchel)<br>n = 26,<br>Alter: k.A.<br>KG n = 11,<br>Alter: k.A.             | Simulation<br>Messung<br>Reaktionszeit vor und nach<br>Schmerz-injektion in Fuß/ Knöchel |                                                                                                                                                                                           |                                                                                                                                                                                                                                                 | Gruppenunterschiede bei Bremsreaktion                                                                                                                      |                        |
| Thiese et al., 2015 [112]<br>USA             | n = 797,<br>Alter: 47.2 (10.5)<br>LKW-Fahrer                                         | Selbstauskunft                                                                           |                                                                                                                                                                                           |                                                                                                                                                                                                                                                 | Zusammenhang zwischen Rückenschmerzen und Unfallhäufigkeit (35,4%).                                                                                        |                        |
| Veldhuijzen et al. 2006 [116]<br>Niederlande | CS (Rücken, Knie)<br>n = 14,<br>Alter: 46.9 (8.5)<br>KG n = 14,<br>Alter: 50.0 (7.5) | Selbstauskunft,<br>Kognitive Tests,<br>Autofahrt                                         | Belastbarkeit: Tracking Test,<br>Gedächtnis und Reaktionsgeschwindigkeit: Sternberg memory scanning test,<br>Geteilte Aufmerksamkeit: Divided attention test<br>Keine Gruppenunterschiede | BDI, Spielberger State-Trait Anxiety scales (STAI), SF-36, Dutch reading test for adults (NLV), VAS, McGill Pain Questionnaire (MPQ), Coping with Pain Questionnaire (CPQ), Coping Strategy Questionnaire (CSQ)<br>Gruppenunterschiede im SF-36 | Standard deviation of lateral position (SDLP): CS > KG.<br>Erhöhtes Risiko für schlechtere Leistungen beim Autofahren.<br>Subjektive Fahrqualität CS < KG. | II                     |
